# Supplementary material for: Compensating control participants when the intervention is of significant value: experience in Guatemala, India, Peru and Rwanda
Source: PubMed Central journal article supplement (PMC6730613; doi:10.1136/bmjgh-2019-001567), 2019-08-21
Supplement: bmjgh-2019-001567supp001.pdf [file bmjgh-2019-001567supp001.pdf]

## Supplementary Material

| <b>Supplementary Table 1: HAPIN Intervention packages and cost per household (intervention households only)</b> |                                                                                      |                                                                                                                                                |                                                                                                                                                                                                                                                                                                                                                        |                                                                                                                                                                                                                                                       |
|-----------------------------------------------------------------------------------------------------------------|--------------------------------------------------------------------------------------|------------------------------------------------------------------------------------------------------------------------------------------------|--------------------------------------------------------------------------------------------------------------------------------------------------------------------------------------------------------------------------------------------------------------------------------------------------------------------------------------------------------|-------------------------------------------------------------------------------------------------------------------------------------------------------------------------------------------------------------------------------------------------------|
|                                                                                                                 | <b>Peru</b>                                                                          | <b>Guatemala</b>                                                                                                                               | <b>India</b>                                                                                                                                                                                                                                                                                                                                           | <b>Rwanda</b>                                                                                                                                                                                                                                         |
| <b>Stove</b>                                                                                                    | Three-burner LPG stove (PEN* 150/ USD 46)                                            | Custom-designed 3-burner LPG stove with built-in <i>comal</i> (griddle for cooking tortillas) (GTQ* 1340/USD 174)                              | Two-burner LPG stove (INR* 2500/ USD 35)                                                                                                                                                                                                                                                                                                               | Three-burner LPG stove (RWF 32,000 /USD 39)                                                                                                                                                                                                           |
| <b>Cylinders and LPG setup materials</b>                                                                        | Two 10 kg LPG cylinders (PEN 120/ USD 36)<br><br>Valve and hose (PEN 12/ USD 4)      | Two 11.3kg cylinders (GTQ 710/ USD 92)<br><br>LPG kit: 2 POL valves, 3m hose, regulator, copper connection tubes, 2 clamps = (GTQ316/ USD 41). | Security deposit for two 14.2 Kg cylinders (INR 2900 / USD 41.12)<br><br>Security deposit for pressure regulator (INR 150 / USD 2.13)<br><br>LPG stove stand, rubber tube, installation & demonstration charges, administrative charges for documentation, domestic gas (DGCC) customer card (INR 2716/ USD 38.55)<br><br>Lighter (INR 135 / USD 1.91) | Two 15 Kg cylinders (RWF 35,000 /USD 42.2 each, empty)<br><br>LPG Kit: Two click-on adaptors, two high pressure hoses, one regulator and hose nozzle, one manual change over valve (€32), one low pressure hose and clips (RWF 2,750). (Total USD 43) |
| <b>Fuel**</b>                                                                                                   | Approximately 2 LPG refills/mo. (20 kg) for 18 months (PEN 1,278/ USD 387)           | Approximately 4 LPG refills/mo. (45.4 kg) for 18 months (GTQ 8136/ USD 1057)                                                                   | Approximately 1 LPG refill/mo. (14.2 kg) for 18 months (INR 15,300 / USD 217)                                                                                                                                                                                                                                                                          | Approximately 1.25 LPG refills/mo. (19Kg) for 18 months (RWF 372,670 /USD 449)                                                                                                                                                                        |
| <b>Additional cooking-related items</b>                                                                         |                                                                                      | Set of pots and pans (GTQ 220/ USD 29)<br><br>Calendar with cooking tips (GTQ 160/ USD 21)                                                     |                                                                                                                                                                                                                                                                                                                                                        | Table (RWF 8,000 /USD 9.60), Roasting appliance (RWF 7,000 /USD 8), 4 cooking Posters (RWF 5,146 /USD 6)                                                                                                                                              |
| <b>Material cost of intervention</b>                                                                            | PEN 1560/ USD 473                                                                    | GTQ 10,882/ USD 1414                                                                                                                           | INR 23701/ USD 336                                                                                                                                                                                                                                                                                                                                     | RWF 529,872 /USD 638                                                                                                                                                                                                                                  |
| <b>Remaining with the household post-trial</b>                                                                  | Stove and one cylinder (PEN 210/ USD 64)                                             | Stove, one cylinder, LPG Kit, set of pots and pans and calendar (GTQ 2395/ USD 311)                                                            | Stove, two cylinders, pressure regulator, rubber tube, stove stand, lighter, DGCC book (INR 8194 / USD 116)                                                                                                                                                                                                                                            | Stove, one cylinder, one hose, clip and one regulator, table, roasting appliance and 4 posters. (RWF 99,896) / USD 120)                                                                                                                               |
| <b>Additional compensation</b>                                                                                  | Gift bag at birth visit with diaper bag, baby clothes, baby blanket (PEN 35/ USD 11) | --                                                                                                                                             | Mock randomization lunchbox (INR 50/ < USD 1) †<br><br>Newborn gift box with baby clothes, baby                                                                                                                                                                                                                                                        | --                                                                                                                                                                                                                                                    |

| <b>Supplementary Table 1: HAPIN Intervention packages and cost per household (intervention households only)</b> |                   |                      |                                                                                                              |                      |
|-----------------------------------------------------------------------------------------------------------------|-------------------|----------------------|--------------------------------------------------------------------------------------------------------------|----------------------|
|                                                                                                                 | <b>Peru</b>       | <b>Guatemala</b>     | <b>India</b>                                                                                                 | <b>Rwanda</b>        |
|                                                                                                                 |                   |                      | towel (INR 200 / USD 3) <sup>†</sup>                                                                         |                      |
|                                                                                                                 |                   |                      | Travel/food allowance for clinic assessments (INR 200/ USD 3 x 3 visits = INR 600/ USD 9) <sup>†</sup>       |                      |
|                                                                                                                 |                   |                      | Time compensation for each home assessment visit (INR 150/ USD 2 x 7 visits = INR 1050/ USD 14) <sup>†</sup> |                      |
| <b>Total cost per household</b>                                                                                 | PEN 1595/ USD 484 | GTQ 10,882/ USD 1414 | INR 25601 / USD 363                                                                                          | RWF 529,872/ USD 638 |

\* Exchange rates: US Dollars (USD) \$1 = 3.3 Peruvian nuevo soles (PEN), 7.7 Guatemalan quetzales (GTQ), 70.44 Indian rupees (INR), 830 Rwandan francs (RWF)

\*\* Note, households are provided as much fuel as needed to fulfill all household cooking tasks. Differing amounts across IRCs reflect differences in cooking habits.

<sup>†</sup> Compensation provided to all participants (intervention and control) in India
